# Supplementary material
Source: PubMed Central journal article supplement (PMC4931563)
Supplement: EMBR-17-0965-s001.pdf [file EMBR-17-0965-s001.pdf]

## **Sinzel et al. Appendix**

### Table of Contents

#### Appendix Figure S1

Over-expression of Mcp3 has no influence on the growth of yeast cells.

#### Appendix Figure S2

Import of Mcp3 is independent of receptor Tom20, TOB subunit Mas37/Sam37 and the IMS import chaperones Tim8/10/13.

#### Appendix Figure S3

MPP is not responsible for processing of Mcp3.

#### Appendix Figure S4

Mitochondria lacking Mim1 or Mim2 display an import defect for matrix destined proteins.

#### Appendix Table 1

*S. cerevisiae* and *E. coli* strains used in this study.

#### Appendix Table 2

Primers used in this study.

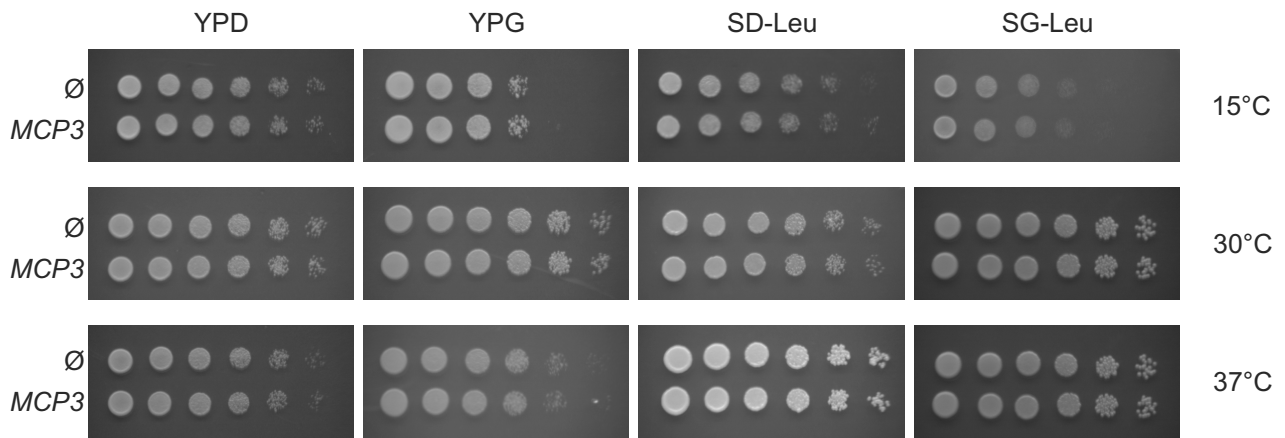

**Appendix Figure S1. Over-expression of Mcp3 has no influence on the growth of yeast cells.** Wild-type cells were transformed with the empty plasmid pYX142 (Ø) or pYX142 encoding Mcp3 (*MCP3*). Cells were grown to an OD<sub>600</sub> of 1.0 in minimal medium lacking leucine and spotted in a 1:5 dilution series on YPD, YPG, SD-Leu or SG-Leu plates directly and in a 1:5 dilution series. Plates were incubated at the indicated temperatures.

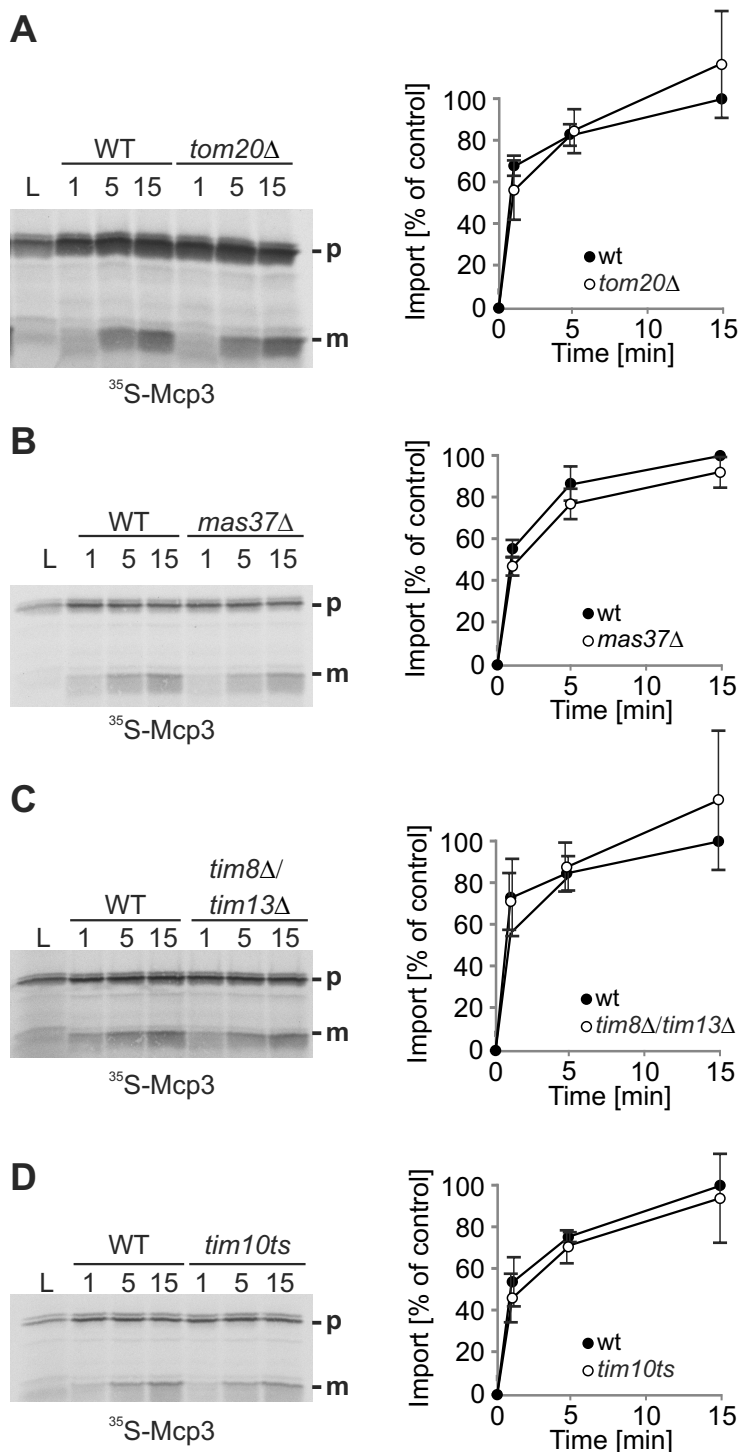

**Appendix Figure S2. Import of Mcp3 is independent of receptor Tom20, TOB subunit Mas37/Sam37 and the IMS import chaperones Tim8/10/13.**

**(A)** Mitochondria from wild-type and *tom20Δ* cells were isolated and incubated with radiolabelled Mcp3 for the indicated time periods (1, 5, 15 min). After import mitochondria were reisolated and analysed by SDS-PAGE and autoradiography. Bands corresponding to the mature (m) form were quantified. Import after 15 min into wild-type mitochondria was set to 100%. The mean with standard deviations of three independent experiments (n=3) is depicted in the graph.

**(B)** Mitochondria from wild-type and *mas37Δ* cells were isolated. Import and analysis was performed as in (A).

**(C)** Mitochondria from wild-type and *tim8Δ/tim13Δ* cells were isolated. Import and analysis was performed as in (A).

**(D)** Mitochondria from wild-type and the temperature sensitive mutant *tim10-1* (*tim10ts*) were isolated after growth at 24°C. Prior to import mitochondria were incubated for 15 min at the non-permissive temperature. Import and analysis were performed as in (A).

L, 20% of radiolabelled precursor protein used in each import reaction; p, precursor; m, mature form.

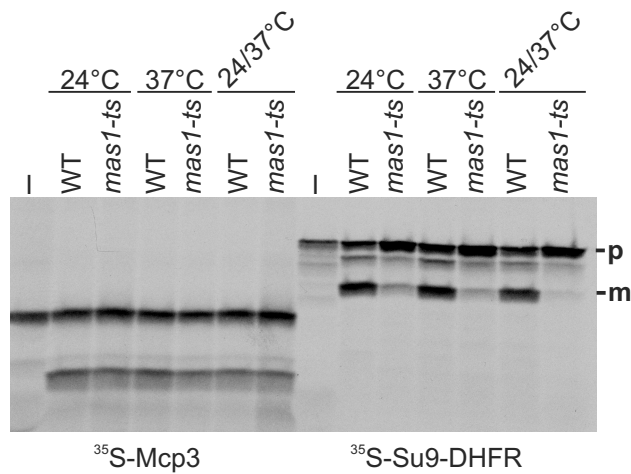

**Appendix Figure S3. MPP is not responsible for processing of Mcp3.** Mitochondria from wild-type (WT) and *mas1-ts* cells were isolated after growth at the permissive temperature 24°C (24°C, 24/37°C) or the non-permissive temperature 37°C (37°C). Next mitochondria were incubated with radiolabelled Mcp3 (<sup>35</sup>S-Mcp3, left part) without preincubation at the non-permissive temperature (24°C, 37°C) or with in vitro shift for 15 min to 37°C prior to the import reaction (24/37°C). Radiolabelled Su9-DHFR as bona fide substrate of MPP was applied in the same way as control for impaired MPP function in mitochondria of the mutant strain (right part). After import mitochondria were reisolated and analysed by SDS-PAGE and autoradiography. I, 20% of radiolabelled precursor protein used in each import reaction; p, precursor; m, mature form.

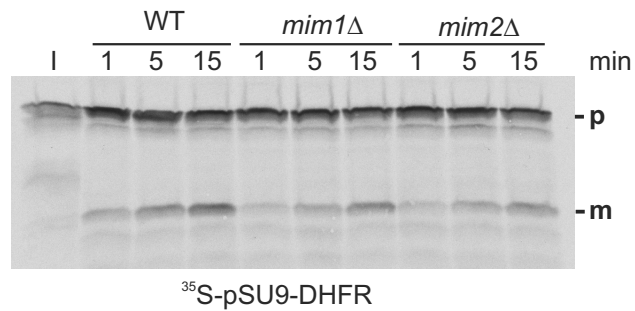

**Appendix Figure S4. Mitochondria lacking Mim1 or Mim2 display an import defect for matrix destined proteins.** Mitochondria from wild-type (WT), *mim1*Δ and *mim2*Δ cells were isolated and incubated with radiolabelled <sup>35</sup>S-pSu9-DHFR for the indicated time periods (1, 5, 15 min). After import mitochondria were reisolated and analysed by SDS-PAGE and autoradiography. Bands corresponding to the mature (m) and precursor (p) form are indicated.

Appendix Table 1: *S. cerevisiae* and *E. coli* strains used in this study

| name                 | genotype                                                                                                                                                        | reference                                                                                                                       |
|----------------------|-----------------------------------------------------------------------------------------------------------------------------------------------------------------|---------------------------------------------------------------------------------------------------------------------------------|
| <i>S. cerevisiae</i> |                                                                                                                                                                 |                                                                                                                                 |
| W303a                | MAT a; <i>ade2-1; can1-100; his3-11; leu2-3,112; trp1Δ2; ura3-52</i>                                                                                            | (Thomas and Rothstein, 1989)                                                                                                    |
| W303α                | MAT α; <i>ade2-1; can1-100; his3-11; leu2-3,112; trp1Δ2; ura3-52</i>                                                                                            | (Thomas and Rothstein, 1989)                                                                                                    |
| YPH499               | MAT a; <i>ade2-101; his3Δ200; leu2Δ1; ura3-52; trp1Δ63; lys2-801</i>                                                                                            | (Sikorski and Hieter, 1989)                                                                                                     |
| BY4741               | Mat a; <i>his3Δ1; leu2Δ0; met15Δ0; ura3Δ0</i>                                                                                                                   | Euroscarf ( <a href="http://web.uni-frankfurt.de/fb15/mikro/euroscarf/">http://web.uni-frankfurt.de/fb15/mikro/euroscarf/</a> ) |
| YMS018               | W303a; <i>fun14Δ::Kan</i>                                                                                                                                       | this study                                                                                                                      |
| YMS019               | W303a; <i>fun14Δ::His3</i>                                                                                                                                      | this study                                                                                                                      |
| YKD291               | W303a; <i>mdm10Δ::His3</i>                                                                                                                                      | (Tan <i>et al.</i> , 2013)                                                                                                      |
| YKD461               | W303a; <i>mmm1Δ::Kan</i>                                                                                                                                        | (Tan <i>et al.</i> , 2013)                                                                                                      |
| YKD227               | W303a; <i>mmm2Δ::Kan</i>                                                                                                                                        | (Tan <i>et al.</i> , 2013)                                                                                                      |
| YKD301               | W303a; <i>mdm12Δ::His3</i>                                                                                                                                      | (Tan <i>et al.</i> , 2013)                                                                                                      |
| YKD303               | W303a; <i>mim2Δ::His3</i>                                                                                                                                       | (Dimmer <i>et al.</i> , 2012)                                                                                                   |
| YKD145               | W303a; <i>mim1Δ::Kan</i>                                                                                                                                        | (Dimmer <i>et al.</i> , 2012)                                                                                                   |
| YKD132               | W303α; <i>tom20Δ::His3</i>                                                                                                                                      | (Muller <i>et al.</i> , 2011)                                                                                                   |
| YDR251               | YPH499; <i>mas37Δ::His3</i>                                                                                                                                     | (Habib <i>et al.</i> , 2005)                                                                                                    |
| 2535                 | YPH499; <i>tom40Δ::Kan</i> ; pFL39- <i>TOM40</i>                                                                                                                | (Wenz <i>et al.</i> , 2014)                                                                                                     |
| 3007; tom40-2522     | YPH499; <i>tom40Δ::Kan</i> ; pFL39- <i>TOM40-25</i>                                                                                                             | (Wenz <i>et al.</i> , 2014)                                                                                                     |
| pTIM23t              | YPH499; <i>tim23Δ::Kan</i> ; pRS315-pTIM23t                                                                                                                     | (Gevorkyan-Airapetov <i>et al.</i> , 2009)                                                                                      |
| pTIM23-Y70A,L71A-t   | YPH499; <i>tim23Δ::Kan</i> ; pRS315-pTIM23-Y70AL71A-t                                                                                                           | (Gevorkyan-Airapetov <i>et al.</i> , 2009)                                                                                      |
| YMS063               | BY4741; <i>fun14Δ::Kan</i>                                                                                                                                      | Euroscarf                                                                                                                       |
| YMS087               | BY4741; <i>atp23Δ::Kan</i>                                                                                                                                      | Euroscarf                                                                                                                       |
| YMS102               | BY4741; <i>pcp1Δ::Kan</i>                                                                                                                                       | Euroscarf                                                                                                                       |
| YMS103               | BY4741; <i>prd1Δ::Kan</i>                                                                                                                                       | Euroscarf                                                                                                                       |
| YMS106               | BY4741; <i>yta12Δ::Kan</i>                                                                                                                                      | Euroscarf                                                                                                                       |
| YMS107               | BY4741; <i>pim1Δ::Kan</i>                                                                                                                                       | Euroscarf                                                                                                                       |
| YMS108               | BY4741; <i>yta10Δ::Kan</i>                                                                                                                                      | Euroscarf                                                                                                                       |
| YMS109               | BY4741; <i>imp1Δ::Kan</i>                                                                                                                                       | Euroscarf                                                                                                                       |
| YMS110               | BY4741; <i>imp2Δ::Kan</i>                                                                                                                                       | Euroscarf                                                                                                                       |
| YMS111               | BY4741; <i>oct1Δ::Kan</i>                                                                                                                                       | Euroscarf                                                                                                                       |
| YMS116               | BY4741; <i>yme1Δ::Kan</i>                                                                                                                                       | Euroscarf                                                                                                                       |
| JSY7452              | MAT α <i>ade2-1; can1-100; his3-11;15; leu2-3; trp1-1; ura3-1</i>                                                                                               | (Kondo-Okamoto <i>et al.</i> , 2008)                                                                                            |
| JSY8283              | JSY7452; <i>tom70Δ::Trp1; tom71Δ::His3</i>                                                                                                                      | (Kondo-Okamoto <i>et al.</i> , 2008)                                                                                            |
| GA74-1A              | MAT a <i>ade8; his3; leu2; trp1; ura3</i>                                                                                                                       | (Koehler <i>et al.</i> , 1998)                                                                                                  |
| CK14                 | GA74D; <i>tim10Δ::His3; tim10-1::Trp1</i>                                                                                                                       | (Koehler <i>et al.</i> , 1998)                                                                                                  |
| MB2                  | MAT a/α, ADE2/ <i>ade2-101<sup>ochre</sup>; his3/his3-Δ200; leu2/leu2-Δ1; lys2-801<sup>amber</sup>/lys2-801<sup>amber</sup>; trp1-289/TRP1; ura3-52/ura3-52</i> | (Maarse <i>et al.</i> , 1992)                                                                                                   |
| TU008/ YDR2628       | MB2; <i>tim8Δ::Ura3; tim13Δ::His3</i>                                                                                                                           | (Paschen <i>et al.</i> , 2000)                                                                                                  |
| MYM104               | MAT α; <i>Ura3-52; trp1-1; leu2-3; leu2-112; his3-11; his3-15</i>                                                                                               | (Witte <i>et al.</i> , 1988)                                                                                                    |
| MYM105               | MYM104; <i>mas1-ts</i>                                                                                                                                          | (Witte <i>et al.</i> , 1988)                                                                                                    |
| YTW224               | YPH499; <i>TOM22-10His</i>                                                                                                                                      | (Meisinger <i>et al.</i> , 2001)                                                                                                |
| YIA30                | W303a; <i>yme1Δ::Kan</i>                                                                                                                                        | (Arnold <i>et al.</i> , 2006)                                                                                                   |
| YKD870               | W303a; <i>yme1Δ::Kan; mim2Δ::His3</i>                                                                                                                           | this study                                                                                                                      |
| <i>E. coli</i>       |                                                                                                                                                                 |                                                                                                                                 |
| MS094                | W3110; pVG18-MPPHis                                                                                                                                             | (Geli, 1993)                                                                                                                    |
| BL21(DE3)            |                                                                                                                                                                 | ThermoFisher Scientific, Darmstadt, Germany                                                                                     |
| MH1                  |                                                                                                                                                                 | NEB biolabs, Frankfurt, Germany                                                                                                 |

## References:

- Arnold, I., M. Wagner-Ecker, W. Ansorge, and T. Langer. 2006. Evidence for a novel mitochondria-to-nucleus signalling pathway in respiring cells lacking i-AAA protease and the ABC-transporter Mdl1. *Gene*. 367:74-88.
- Dimmer, K.S., D. Papić, B. Schumann, D. Sperl, K. Krumpke, D.M. Walther, and D. Rapaport. 2012. A crucial role for Mim2 in the biogenesis of mitochondrial outer membrane proteins. *Journal of cell science*. 125:3464-3473.
- Geli, V. 1993. Functional reconstitution in *Escherichia coli* of the yeast mitochondrial matrix peptidase from its two inactive subunits. *Proc Natl Acad Sci U S A*. 90:6247-6251.
- Gevorkyan-Airapetov, L., K. Zohary, D. Popov-Celeketić, K. Mapa, K. Hell, W. Neupert, A. Azem, and D. Mokranjac. 2009. Interaction of Tim23 with Tim50 Is essential for protein translocation by the mitochondrial TIM23 complex. *The Journal of biological chemistry*. 284:4865-4872.
- Habib, S.J., T. Waizenegger, M. Lech, W. Neupert, and D. Rapaport. 2005. Assembly of the TOB complex of mitochondria. *The Journal of biological chemistry*. 280:6434-6440.
- Koehler, C.M., E. Jarosch, K. Tokatlidis, K. Schmid, R.J. Schweyen, and G. Schatz. 1998. Import of mitochondrial carriers mediated by essential proteins of the intermembrane space. *Science*. 279:369-373.
- Kondo-Okamoto, N., J.M. Shaw, and K. Okamoto. 2008. Tetratricopeptide repeat proteins Tom70 and Tom71 mediate yeast mitochondrial morphogenesis. *EMBO reports*. 9:63-69.
- Maarse, A.C., J. Blom, L.A. Grivell, and M. Meijer. 1992. MPI1, an essential gene encoding a mitochondrial membrane protein, is possibly involved in protein import into yeast mitochondria. *The EMBO journal*. 11:3619-3628.
- Meisinger, C., M.T. Ryan, K. Hill, K. Model, J.H. Lim, A. Sickmann, H. Müller, H.E. Meyer, R. Wagner, and N. Pfanner. 2001. Protein import channel of the outer mitochondrial membrane: a highly stable Tom40-Tom22 core structure differentially interacts with preproteins, small tom proteins, and import receptors. *Molecular and cellular biology*. 21:2337-2348.
- Müller, J.E., D. Papić, T. Ulrich, I. Grin, M. Schutz, P. Oberhettinger, J. Tommassen, D. Linke, K.S. Dimmer, I.B. Autenrieth, and D. Rapaport. 2011. Mitochondria can recognize and assemble fragments of a beta-barrel structure. *Mol Biol Cell*. 22:1638-1647.
- Paschen, S.A., U. Rothbauer, K. Kaldi, M.F. Bauer, W. Neupert, and M. Brunner. 2000. The role of the TIM8-13 complex in the import of Tim23 into mitochondria. *The EMBO journal*. 19:6392-6400.
- Sikorski, R.S., and P. Hieter. 1989. A system of shuttle vectors and yeast host strains designed for efficient manipulation of DNA in *Saccharomyces cerevisiae*. *Genetics*. 122:19-27.
- Tan, T., C. Ozbalci, B. Brugger, D. Rapaport, and K.S. Dimmer. 2013. Mcp1 and Mcp2, two novel proteins involved in mitochondrial lipid homeostasis. *Journal of cell science*. 126:3563-3574.
- Thomas, B.J., and R. Rothstein. 1989. Elevated recombination rates in transcriptionally active DNA. *Cell*. 56:619-630.
- Wenz, L.S., L. Opalinski, M.H. Schuler, L. Ellenrieder, R. Ieva, L. Bottinger, J. Qiu, M. van der Laan, N. Wiedemann, B. Guiard, N. Pfanner, and T. Becker. 2014. The presequence pathway is involved in protein sorting to the mitochondrial outer membrane. *EMBO reports*. 15:678-685.
- Witte, C., R.E. Jensen, M.P. Yaffe, and G. Schatz. 1988. MAS1, a gene essential for yeast mitochondrial assembly, encodes a subunit of the mitochondrial processing protease. *The EMBO journal*. 7:1439-1447.

Appendix Table 2. Primers used in this study

| Primers for gene-targeting |                                                                                                       |                                                                                                                                                            |
|----------------------------|-------------------------------------------------------------------------------------------------------|------------------------------------------------------------------------------------------------------------------------------------------------------------|
| name                       | sequence                                                                                              | remarks                                                                                                                                                    |
| PFa-For-Fun14K             | 5' ACG CTA GAG GGG CAA GAA<br>GGA AGA ACT TAA AAT AAT AGG<br>TGT AAA <i>CGT ACG CTG</i>               | amplification of KanMX4 or HISMX6 cassette                                                                                                                 |
| PFa-Rev-Fun14K             | 5' AAC GAA AGA ATA TAA CCC<br>TCG TTT ATA TCT GGT CAT TTG<br>TCT TGC <i>ATC GAT GAA</i>               | amplification of KanMX4 or HISMX6 cassette                                                                                                                 |
| Primers for cloning        |                                                                                                       |                                                                                                                                                            |
| name                       | sequence                                                                                              | remarks                                                                                                                                                    |
| FpYX-Fun14                 | 5' GGG GAA TTC ATG ACT TTG GCT<br>TTT AAT ATG CA                                                      | amplification of <i>MCP3</i> ORF 5'<br>contains <i>EcoRI</i> restriction site                                                                              |
| RpYX-Fun14                 | 5' GGG AAG CTT TCA TTT GTT AGC<br>ATT TAA ACT TGC                                                     | amplification of <i>MCP3</i> ORF 3'<br>contains <i>HindIII</i> restriction site                                                                            |
| FUN14intHArev              | 5' GGG GGA TCC <i>TGC GTA GTC AGG</i><br><i>CAC ATC ATA CGG ATA CCC TAA</i><br>AGA ATC ATT GAA TAT CA | amplification of <i>MCP3</i> presequence 3'<br>contains <i>BamHI</i> restriction site and<br>encodes the HA tag                                            |
| Fun14intHAfwd              | 5' GGG GGA TCC GCA GCT GTC<br>AAA CAA CAG G                                                           | amplification of <i>MCP3</i> mature part 5'<br>(starting 4 codons downstream of<br>predicted Imp1 cleavage site)<br>contains <i>BamHI</i> restriction site |
| D70G_Fun14fwd              | 5' GAT ATT CAA TGG TTC TTT AGG<br>G                                                                   | site directed mutagenesis for D70G<br>amino acid exchange (sense)                                                                                          |
| D70G_Fun14rev              | 5' CTA TAA GTT ACC AAG AAA<br>TCC C                                                                   | site directed mutagenesis for D70G<br>amino acid exchange (antisense)                                                                                      |
| F14PromFwd                 | 5' GGG GAG CTC GTG GCT TAA<br>AGA CGA TAA TGC                                                         | amplification of <i>MCP3</i> promoter 5'<br>contains <i>SacI</i> restriction site                                                                          |
| F14PromRev                 | 5' GGG GAA TTC TTT ACA CCT ATT<br>ATT TTA AGT TCT T                                                   | amplification of <i>MCP3</i> promoter 3'<br>contains <i>EcoRI</i> restriction site                                                                         |
| F14TermFwd                 | 5' GGG AAG CTT GCAAGA CAA<br>ATG ACC AGA TAT A                                                        | amplification of <i>MCP3</i> terminator 5'<br>contains <i>HindIII</i> restriction site                                                                     |
| F14TermRev                 | 5' GGG GTC GAC AGC GTT GAA<br>AAA GGT AGA AAT TA                                                      | amplification of <i>MCP3</i> terminator 3'<br>contains <i>SalI</i> restriction site                                                                        |
| delta-TMD1-Arev            | 5' GGG GGA TCC CTG CTT GTG ACT<br>ACT TAT TTT G                                                       | amplification of aa 1-105 coding<br>sequence of <i>MCP3</i> , contains <i>BamHI</i><br>restriction site                                                    |
| delta-TMD1-Bfwd            | 5' GGG GGA TCC TAT GTC GGT ATT<br>ACA AGC ATG                                                         | amplification of aa 129-198 coding<br>sequence of <i>MCP3</i> , contains <i>BamHI</i><br>restriction site                                                  |
| delta-TMD2-rev             | 5' GGG AAG CTT TTA ATC AAT<br>AAG CAG TTT CTT CAA GT                                                  | amplification of aa 1-171 coding<br>sequence of <i>MCP3</i> , contains <i>HindIII</i><br>restriction site                                                  |
| RpYX-Fun14HA               | 5' GGG AAG CTT TTT GTT AGC ATT<br>TAA ACT TGC TAA                                                     | amplification of <i>MCP3</i> ORF 3'<br>contains <i>HindIII</i> restriction site, stop<br>codon omitted for fusion with HA-tag                              |
