# Supplementary material
Source: PubMed Central journal article supplement (PMC4931563)
Supplement: EMBR-17-0965-s002.pdf [file EMBR-17-0965-s002.pdf]

## Expanded View Figures

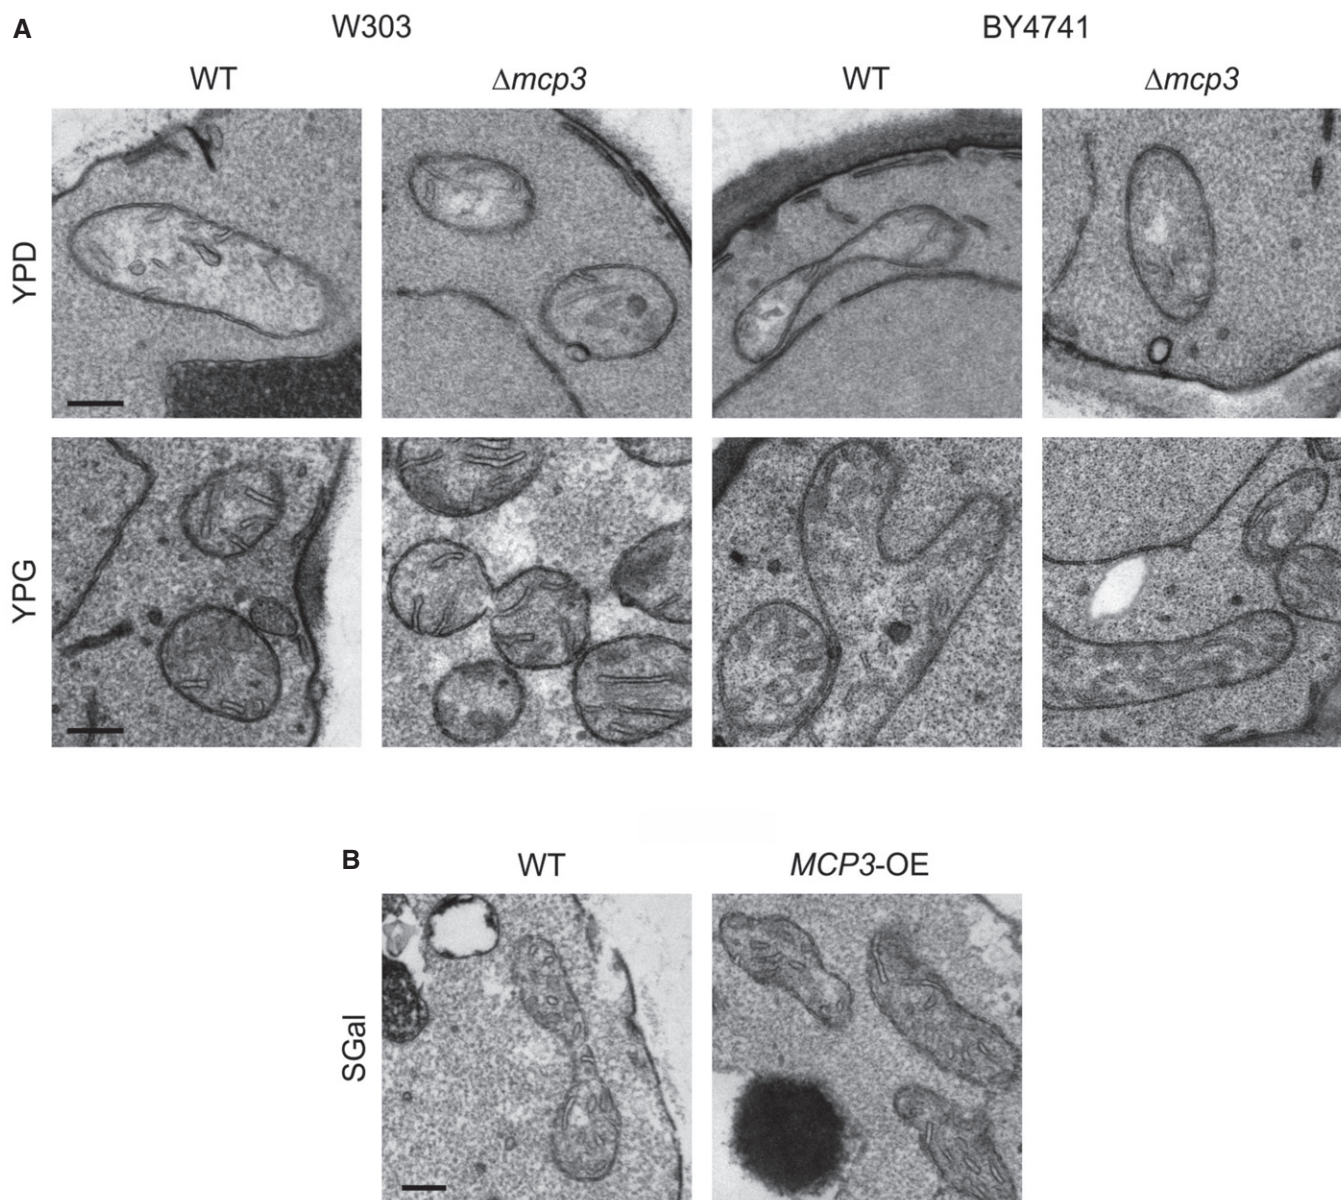

**Figure EV1. Altered levels of Mcp3 have no effect on mitochondrial ultrastructure.**

**A** WT and *mcp3* $\Delta$  cells in two different genetic backgrounds (W303 and BY4741) were grown in glucose (YPD) or glycerol (YPG) containing medium and analysed by thin-section transmission electron microscopy. Representative images of mitochondria are shown. Scale bars, 200 nm.

**B** WT cells carrying an empty plasmid (WT) and cells overexpressing *MCP3* from a plasmid under control of the *TPI* promoter (*MCP3*-OE) were grown in galactose-containing minimal medium (SGal) and analysed by thin-section transmission electron microscopy. Representative images of mitochondria are shown. Scale bar, 200 nm.

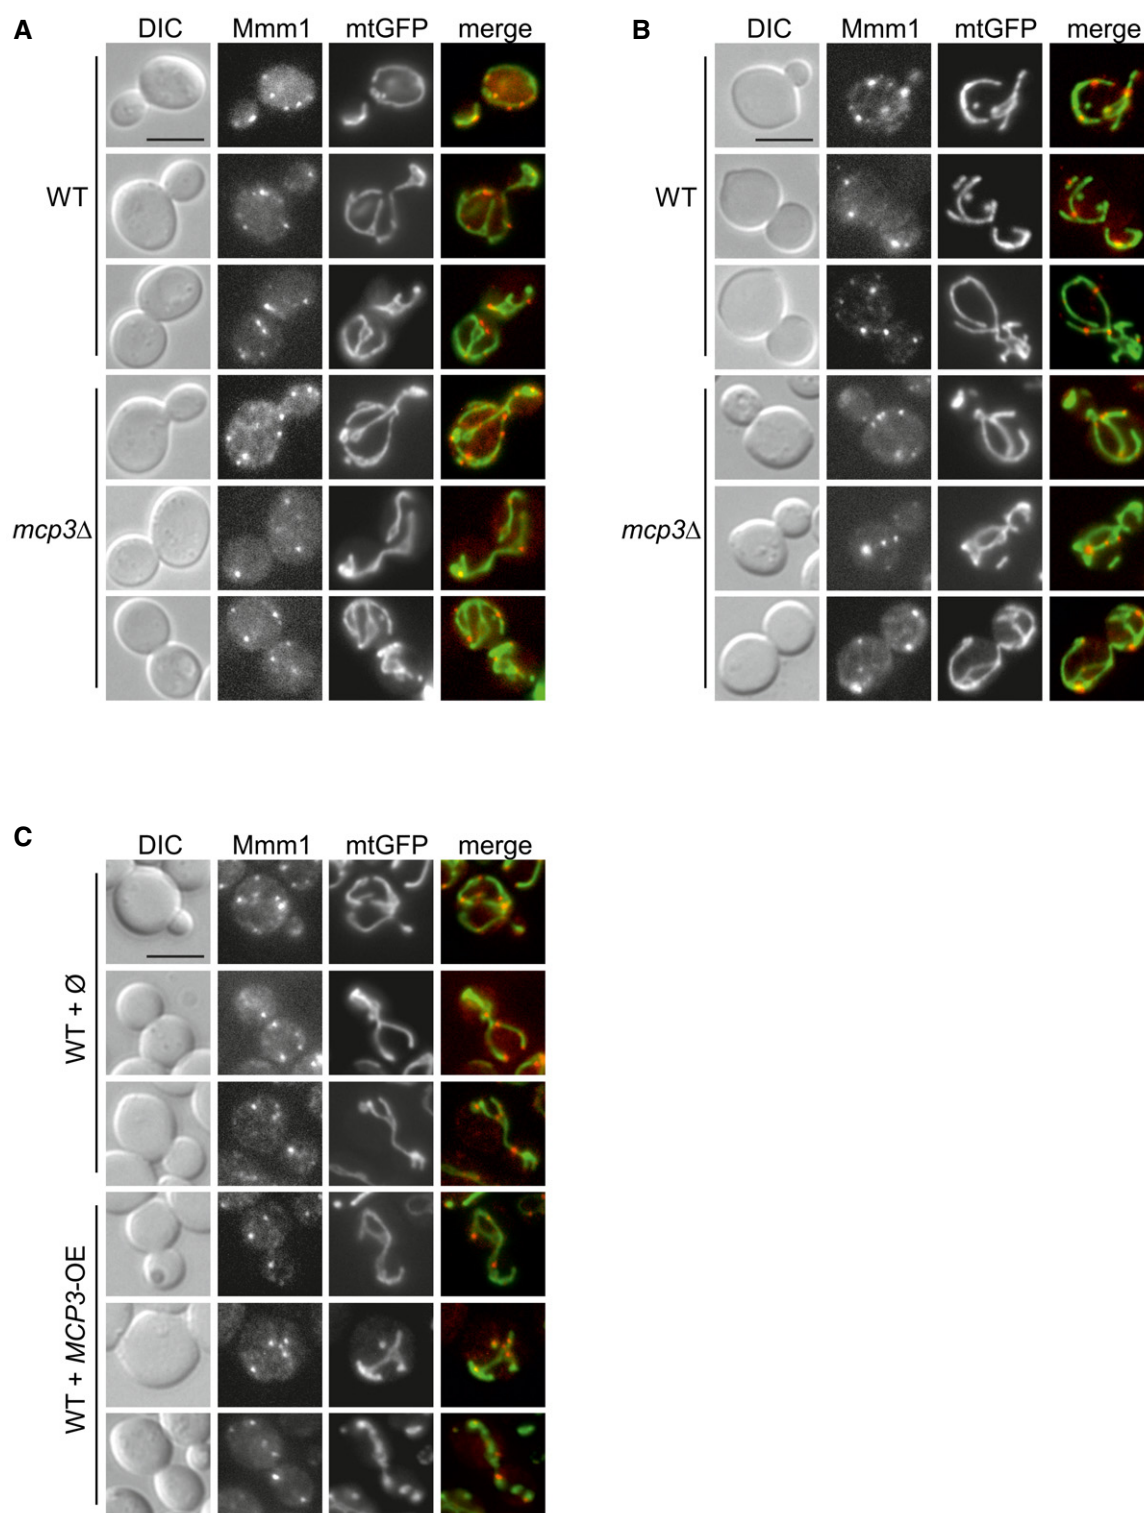

**Figure EV2. Altered levels of Mcp3 have no effect on ERMEs foci formation and colocalization with mitochondria.**

A, B WT and *mcp3Δ* cells (from BY4741 (A) or W303 (B) background) expressing mitochondrially targeted GFP (mtGFP) and RFP-tagged Mmm1 were grown to mid-logarithmic phase and then analysed by fluorescence microscopy. Representative images are shown. Scale Bars, 5  $\mu$ m.

C WT cells harbouring an empty plasmid or a plasmid overexpressing Mcp3 (BY4741 background) were transformed with plasmids encoding mitochondrially targeted GFP (mtGFP) and RFP-tagged Mmm1 and were analysed as in (A). Scale Bar, 5  $\mu$ m.

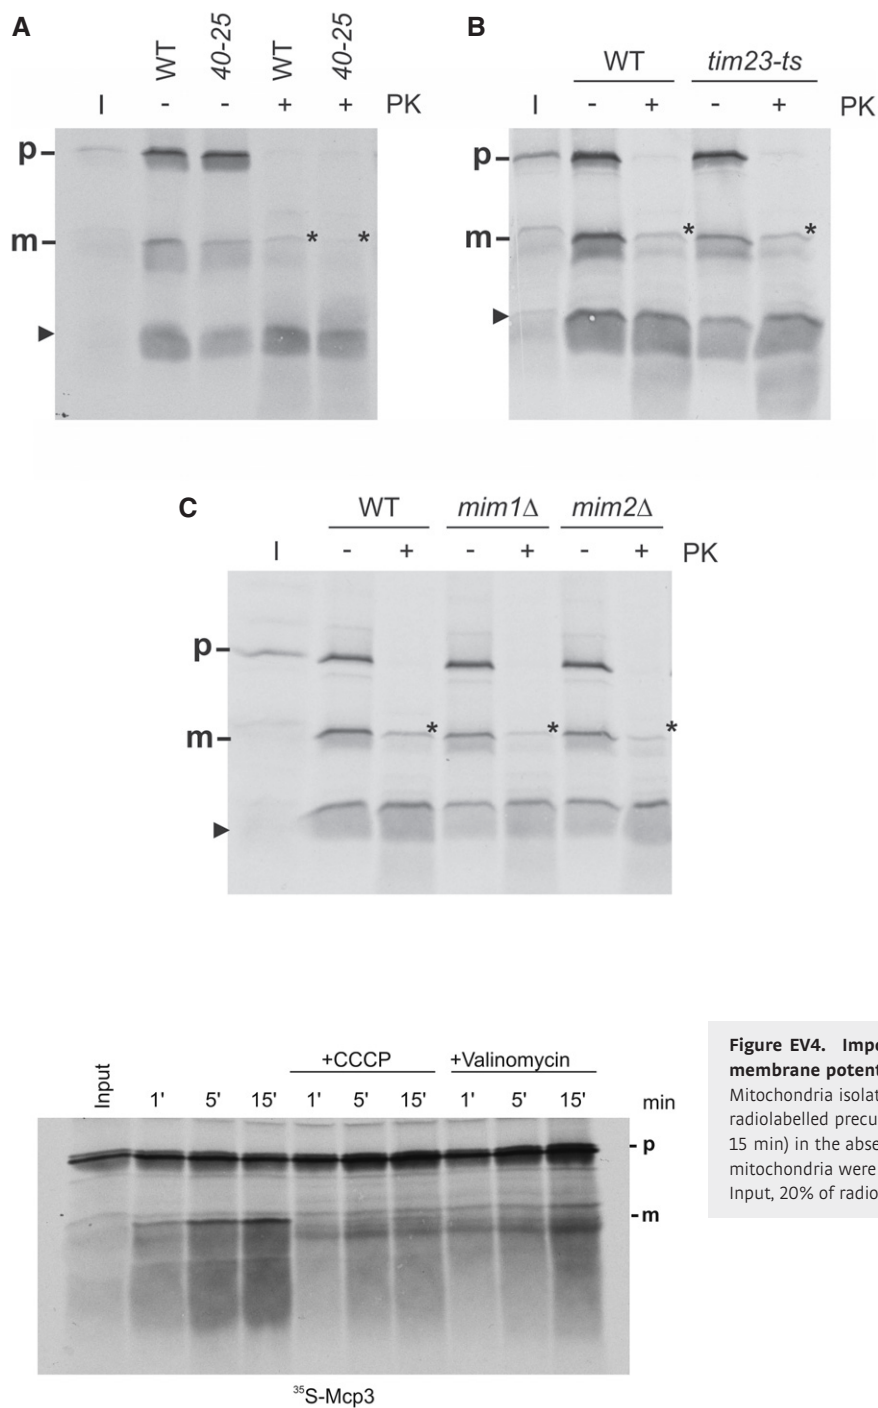

**Figure EV3. Mcp3 precursor is degraded by PK *in vitro* if it does not reach the inter membrane space.**

A Mitochondria from wild-type and *tom40-25* cells were isolated and incubated with radiolabelled Mcp3 for 15 min. After import, mitochondria were reisolated, left untreated or incubated with proteinase K (PK) and analysed by SDS-PAGE and autoradiography.

B Mitochondria from wild-type and *tim23-ts* cells were isolated and incubated with radiolabelled Mcp3 for 15 min. Analysis was performed as in (A).

C Mitochondria from wild-type and *mim1Δ* or *mim2Δ* cells were isolated and incubated with radiolabelled Mcp3 for 15 min. Analysis was performed as in (A).

Data information: The mature (m) and precursor (p) form of Mcp3 are indicated. The arrowhead marks an additional band of the size of the cleaved N-terminus of Mcp3. The asterisk depicts a fragment of the size of mature Mcp3 that is PK protected.

**Figure EV4. Import of Mcp3 is dependent on the mitochondrial membrane potential.**

Mitochondria isolated from wild-type yeast cells were incubated with radiolabelled precursor protein Mcp3 for the indicated time periods (1, 5 or 15 min) in the absence or presence of CCCP or valinomycin. After import, mitochondria were reisolated and analysed by SDS-PAGE and autoradiography. Input, 20% of radiolabeled precursor applied in the reaction.
